# Supplementary material for: CK1α overexpression correlates with poor survival in colorectal cancer
Source: Springer Nature journal article supplement (doi:10.1186/s12885-018-4019-0), 2018-02-06

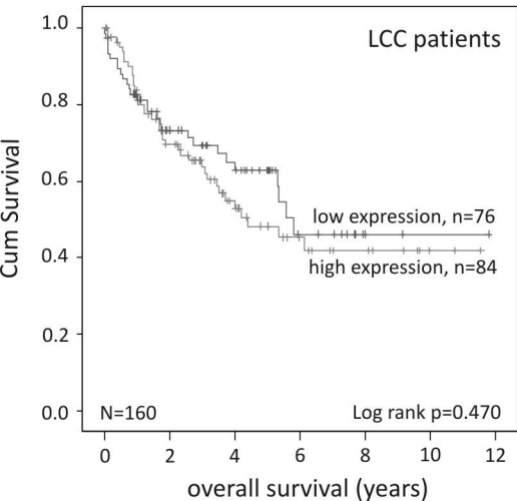

Supplement: MOESM6 [file 15442814]
